# Supplementary material
Source: PubMed Central journal article supplement (PMC5314997)
Supplement: Supp_Fig3.pdf [file Supp_Fig3.pdf]

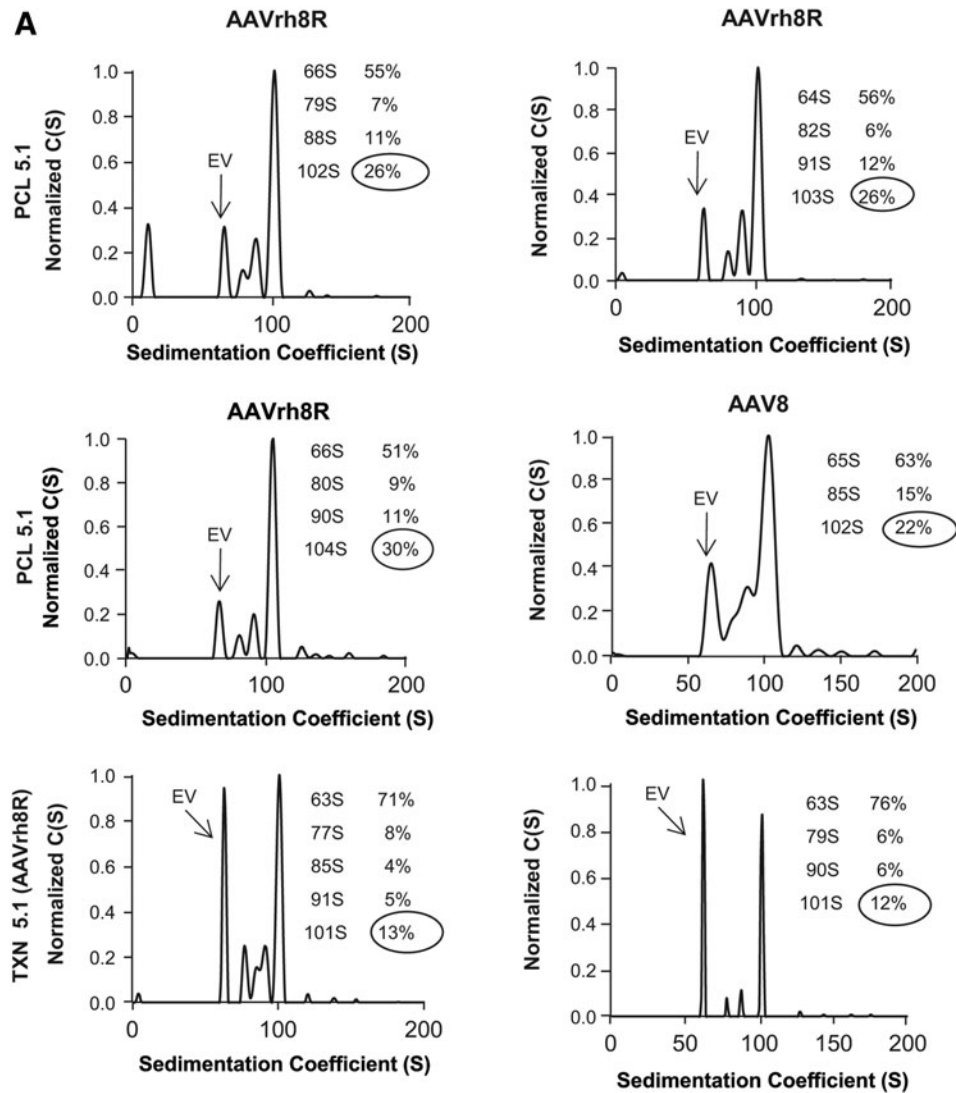

**B**

| Capsid                         | AAVrh8R |         |         |         |         |         | AAV8    |         |
|--------------------------------|---------|---------|---------|---------|---------|---------|---------|---------|
| Production                     | PCL 5.1 | PCL 5.1 | PCL 5.1 | TXN 5.1 | TXN 5.1 | PCL 5.4 | TXN 5.4 | PCL 5.1 |
| % virus with VGs               | 44      | 44      | 49      | 30      | 24      | 25      | 23      | 37      |
| % virus with $\geq 4.7$ kb VGs | 26      | 26      | 30      | 13      | 12      | 17      | 9       | 22      |

**Supplementary Figure S3.** rAAV/FVIII vector lot characterization by AUC analysis. **(A)** AUC analysis for the 5.1 kb FVIII vectors generated by the PCL and TXN methods. All three rAAVrh8R and one AAV8 lots produced by the PCL method and two lots produced by TXN method for the 5.1 kb FVIII vector are shown. The insert shows the vector sedimentation value (S) and percentage (%) for each peak. The empty virion (EV) peak has an S value of 63–64, while virions with 4.7 kb vector genomes are typically 100S–103S. **(B)** Summary of AUC analysis for all 5.1 and 5.4 kb vectors generated. The sum of VG containing particles and the portion of particles containing VGs with  $\geq 4.7$  genomes (capsids with  $\geq 99$ S) are indicated as % of total.
