# Supplementary material
Source: PubMed Central journal article supplement (PMC5314997)
Supplement: Supp_Table1.pdf [file Supp_Table1.pdf]

**Supplementary Table S1. Nucleotide sequences of the various primers and oligonucleotide probes**

| <i>Description</i> | <i>Sequence</i>                     |
|--------------------|-------------------------------------|
| FVIII A3-FP        | 5'-GTTCCACGCCATCAACGG-3'            |
| FVIII A3-RP        | 5'-GAGCCCATGGACAGCAGATAC-3'         |
| FVIII A3 probe     | 5'-CCCGGCCTCGTGATGGCTCA-3'          |
| FVIII C2-FP        | 5'-CACCCCGTCGTGAATAGC-3'            |
| FVIII C2-RP        | 5'-TTCCATCCGCAGAGCAATCT             |
| FVIII C2 probe     | 5'-TGGACCTCCACTGCTGACCAGATACC-3'    |
| Puromycin-FP       | 5'-GGACCGCCACATCGAGC-3'             |
| Puromycin-RP       | 5'-CCCGCTTCGACGCT-3'                |
| Puromycin-probe    | 5'-TCACCGAGCTGCAAGAACTCTTCCTCAC-3'  |
| Oligo#178(+)       | 5'-GCCGCACACAAAAACCAACACACAGAT-3'   |
| Oligo#4931/5099(+) | 5'-AGTATCGGAACACTCGCTCTACGAAATGT-3' |
| Oligo#189/352(-)   | 5'-ACATTCGTAGAGCGAGTGTCCGATACT-3'   |
| Oligo#4941(-)      | 5'-ATCTGTGTGTTGGTTTTTGTGTGCGGC-3'   |
| Oligo#503(+)       | 5'-GAGGGTCCAGGCTATTCACGACGG-3'      |
| Oligo#4927(+)      | 5'-ATCTGTGTGACGGCTTCTCCTGGTGAA-3'   |
| Oligo#352(-)       | 5'-ACATTCGTAGAGCGAGTGTCCGATACT-3'   |
| Oligo#4944(-)      | 5'-CCGTCGTGAATAGCCTGGACCCCTC-3'     |
| Oligo#5083(-)      | 5'-TGGGAGTGGCACCTTCCA-3'            |

(+), (-), Oligo sequences used to detect the plus (+) or (-) strands of vector genomes.
