# Supplementary material
Source: PubMed Central journal article supplement (PMC5314997)
Supplement: Supp_Table2.pdf [file Supp_Table2.pdf]

**Supplementary Table S2. Summary of the relative production screen results for the four vectors**

| <i>Number of MWs in producer class<sup>a</sup></i> | <i>AAV8/FVIII-5.1</i> | <i>AAVrh8R/FVIII-5.1</i> | <i>AAVrh8R/FVIII-5.4</i> | <i>AAV8/SEAP-4.3<sup>b</sup></i> |
|----------------------------------------------------|-----------------------|--------------------------|--------------------------|----------------------------------|
| High ( $>1 \times 10^{10}$ )                       | 4                     | 1                        | 1                        | 7                                |
| Medium ( $1 \times 10^9$ to $1 \times 10^{10}$ )   | 6                     | 7                        | 15                       | 29                               |
| Low ( $1 \times 10^8$ to $1 \times 10^9$ )         | 21                    | 10                       | 23                       | 34                               |
| Very low ( $1 \times 10^7$ to $1 \times 10^8$ )    | 27                    | 32                       | 40                       | 74                               |
| % High                                             | 1.2                   | 0.3                      | 0.2                      | 3.3                              |
| % Positive ( $>1 \times 10^7$ )                    | 17.6                  | 13.5                     | 19.1                     | 68.1                             |
| % Negative ( $<1 \times 10^7$ )                    | 82.4                  | 86.5                     | 80.8                     | 31.9                             |
| Total screened                                     | 329                   | 371                      | 412                      | 213                              |

<sup>a</sup>Classification based on productivity (vg/mL) measured by qPCR using FVIII-A2 primer/probe set.

<sup>b</sup>Standard-sized vector (4.3 kb) with SEAP and packaged into AAV8 capsids shown for comparison.
