# Supplementary material
Source: PubMed Central journal article supplement (PMC5314997)
Supplement: Supp_Table3.pdf [file Supp_Table3.pdf]

**Supplementary Table S3. Specific productivity and genomic DNA analysis for selected MWs**

| Vector                       | MW #   | Productivity <sup>a</sup> (vg/cell), n         | Copies/cell <sup>b</sup> FVIII | Rep  | Puro |
|------------------------------|--------|------------------------------------------------|--------------------------------|------|------|
| AAVrh8R/5.1                  | 35     | $1.0 \times 10^5 \pm 1.9 \times 10^4$ (H) (5)  | 52                             | 47   | 48   |
| AAVrh8R/5.1                  | 272    | $5.8 \times 10^3 \pm 1.0 \times 10^3$ (M) (2)  | 15                             | 18   | 17   |
| AAVrh8R/5.1                  | 418    | $1.5 \times 10^4 \pm 4.7 \times 10^3$ (M) (7)  | 191                            | 191  | 202  |
| AAVrh8R/opt-5.1 <sup>c</sup> | 14     | $5.1 \times 10^4 \pm 2.5 \times 10^4$ (H) (8)  | 1072                           | 1115 | 1016 |
| AAVrh8R/opt-5.1 <sup>c</sup> | 27     | $2.9 \times 10^4 \pm 9.6 \times 10^3$ (M) (7)  | 56                             | 51   | 52   |
| AAV8/5.1                     | 287    | $2.4 \times 10^5 \pm 5.0 \times 10^4$ (H) (8)  | 212                            | 208  | 182  |
| AAV8/5.1                     | 342    | $8.2 \times 10^5 \pm 3.9 \times 10^4$ (H) (8)  | 61                             | 61   | 66   |
| AAVrh8R/5.4                  | 61     | $1.2 \times 10^4 \pm 1.1 \times 10^4$ (M) (9)  | 184                            | 179  | 169  |
| AAVrh8R/5.4                  | 163    | $5.1 \times 10^4 \pm 2.1 \times 10^4$ (H) (6)  | 196                            | 181  | 162  |
| AAV2/SEAP-4.3 <sup>d</sup>   | 156    | $2.1 \times 10^5 \pm 9.5 \times 10^4$ (H) (10) | 0                              | 48   | 48   |
|                              | HELAS3 |                                                | 0                              | 0    | 0    |

<sup>a</sup>Vector production in 20 mL shaker flask cultures was measured by qPCR using FVIII-A2 primer/probe set. H, high-producing MWs are defined as  $\geq 5.0 \times 10^4$  vg/cell; M, medium producer as  $5.0 \times 10^3$  to  $5.0 \times 10^4$  vg/cell. N, number of independent measurements.

<sup>b</sup>Copy numbers of FVIII (FVIII-A2 primer/probe set), *rep* and *puro*<sup>R</sup> genes by qPCR (levels normalized to E6 gene in HeLaS3 cells [11 copies per HeLaS3 genome]).

<sup>c</sup>MWs containing mTTR202opt-HI-FVIII expression cassette.

<sup>d</sup>Published data.<sup>26</sup>
