# Supplementary material
Source: PubMed Central journal article supplement (PMC5314997)
Supplement: Supp_Table4.pdf [file Supp_Table4.pdf]

**Supplementary Table S4. Non-vector DNA packaging in vectors produced by PCL or TXN**

| <i>Vectors by PCL</i> | <i>Vector titer (vg/mL)<sup>a</sup></i> |                               | <i>% Puromycin</i>  |
|-----------------------|-----------------------------------------|-------------------------------|---------------------|
|                       | <i>FVIII<sup>a</sup></i>                | <i>Puromycin<sup>b</sup></i>  |                     |
| AAVrh8R/FVIII-5.1     | $1.2 \times 10^{12}$                    | $5.4 \times 10^9$             | 0.44                |
| AAVrh8R/FVIII-5.4     | $7.6 \times 10^{12}$                    | $1.5 \times 10^{10}$          | 0.20                |
| AAV8/FVIII-5.1        | $5.1 \times 10^{12}$                    | $1.2 \times 10^{10}$          | 0.24                |
| <i>Vectors by TXN</i> | <i>FVIII<sup>a</sup></i>                | <i>Ampicillin<sup>b</sup></i> | <i>% Ampicillin</i> |
| AAVrh8R/FVIII-5.1     | $2.3 \times 10^{13}$                    | $4.8 \times 10^{11}$          | 2.10                |
| AAVrh8R/FVIII-5.4     | $1.6 \times 10^{13}$                    | $5.4 \times 10^{11}$          | 3.40                |
| AAVrh8R/FVIII-4.6     | $1.2 \times 10^{13}$                    | $2.5 \times 10^{11}$          | 2.00                |

<sup>a</sup>Measured by qPCR using FVIII-A2 primer/probe set.

<sup>b</sup>Measured by qPCR for packaged puromycin (PCL) or ampicillin sequences (TXN).
